# Supplementary material
Source: publisher figshare collection journal article supplement (https://acs.figshare.com/ndownloader/files/5068651)
Supplement: Supplementary file 1 [file 5068651]

## Supporting Information

**Synthesis of microporous hybrid.** The host layer compound, cesium titanate ( $\text{Cs}_x\text{Ti}_{2-x/4}\text{O}_4$ ,  $x = 0.67$ ), was prepared by the solid-state reaction of a stoichiometric mixture of  $\text{Cs}_2\text{CO}_3$  and  $\text{TiO}_2$  at 800 °C for 20 h. The protonic form ( $\text{H}_x\text{Ti}_{2-x/4}\text{O}_4 \cdot \text{H}_2\text{O}$ ,  $x = 0.67$ ) was obtained by stirring the cesium titanate in a HCl solution (1 M) at room temperature for 3 days. The HCl solution was replaced with a fresh one every 24 h. The layered protonic titanate (1 g) was exfoliated into titanate single layers by intercalating 250 ml of the TBAOH solution (0.016 M) for 7 days at room temperature. The TBA/H molar ratio was adjusted to cation-exchange capacity (CEC) of the layered protonic titanate, which is a favorable condition for exfoliation.

Titanium isopropoxide (30 ml) with acetylacetone (20.4 ml) was added dropwise to vigorously stirred mixture solution of 180 ml of distilled water and 2 ml of  $\text{HNO}_3$  (14 M). The resulting solution was peptized by further stirring at 60 °C for 8 h, which gives rise to a mono-dispersed and non-aggregated  $\text{TiO}_2$  nano-sol with anatase phase.

A  $\text{TiO}_2$ -pillared layered titanate has been prepared by hybridizing the exfoliated layered titanate solution (20 ml) with the anatase  $\text{TiO}_2$  nano-sol (20 ml) at 60 °C for 24 h. The product was collected by centrifuging (12000 rpm, 10 min), washed with a mixed solution of distilled water and ethanol (1:1, v/v) to remove excess  $\text{TiO}_2$  sol, and dried in ambient atmosphere. Finally, the obtained material was heated at 300 °C for 2 h in order to complete the pillaring process.

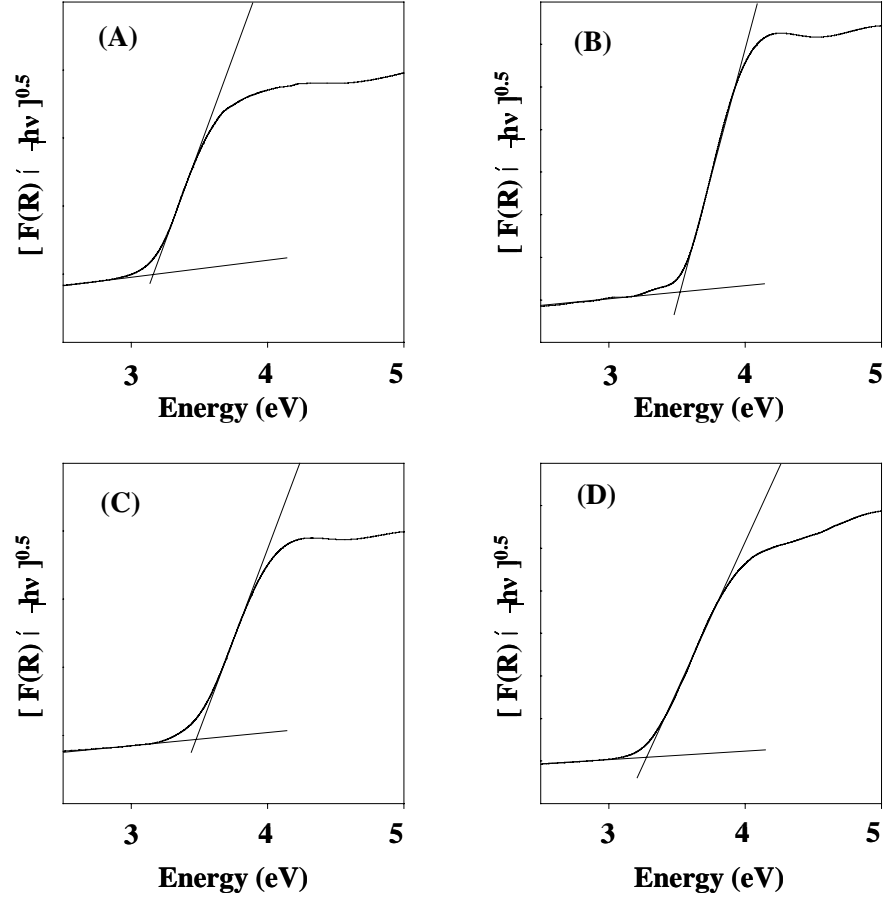

**S1.** Plots of  $[F(R) \times hv]^{0.5}$  vs energy, where R is the reflectance from the UV-vis diffuse reflectance measurements: (A)  $\text{TiO}_2$  xerogel,  $E_g = 3.2$  eV: (B) layered cesium titanate,  $E_g = 3.5$  eV: (C) layered protonic titanate,  $E_g = 3.4$  eV: (D) nanohybrid-I,  $E_g = 3.3$  eV. The intercept of the two linearly extrapolated lines gives the bandgap energy ( $E_g$ ).

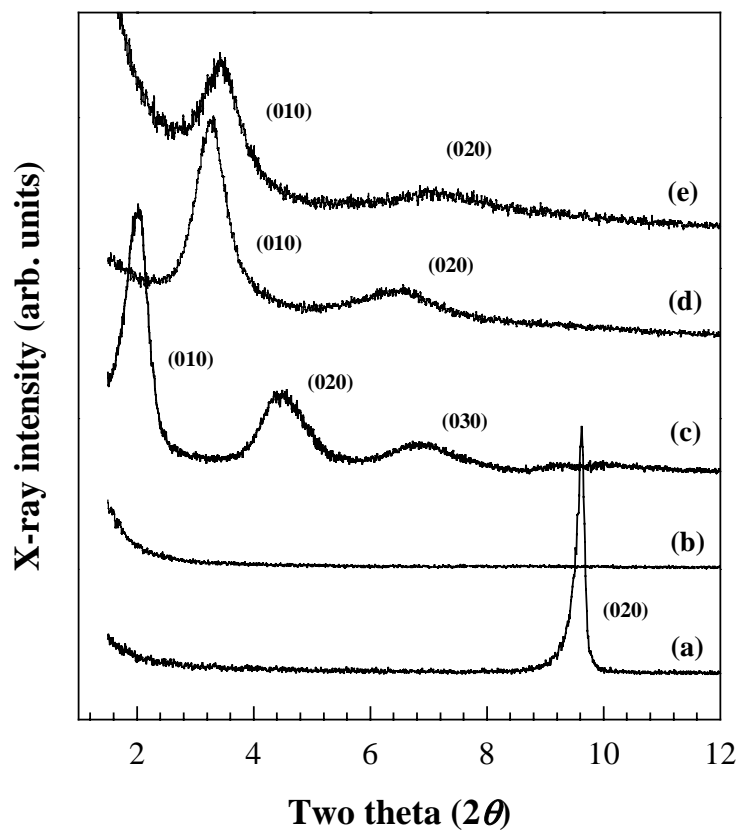

**S2.** Powder XRD patterns for microporous nanohybrid derivatives: (a) layered titanate, (b) the colloidal suspension of exfoliated titanate, (c) as-prepared microporous nanohybrid, (d) microporous nanohybrid with the heat-treatment at 300 °C, (e) microporous nanohybrid with the heat-treatment at 350 °C.
